# Supplementary material for: Se-doped Li6PS5Cl and Li5.5PS4.5Cl1.5 with improved ionic conductivity and interfacial compatibility: a high-throughput DFT study
Source: Royal Society of Chemistry journal article supplement (doi:10.1039/d2tc03696g), 2022-01-01

## Supporting Information

### **Se-doped $\text{Li}_6\text{PS}_5\text{Cl}$ and $\text{Li}_{5.5}\text{PS}_{4.5}\text{Cl}_{1.5}$ with improved ionic conductivity and interfacial compatibility: a high-throughput DFT study**

Ming Jiang<sup>1</sup>, Zhi-Wen Chen<sup>2</sup>, Adwitiya Rao<sup>2</sup>, Li-Xin Chen<sup>2</sup>, Xiao-Tao Zu<sup>3,\*</sup>, Chandra Veer Singh<sup>2,4,\*</sup>

<sup>1</sup>Institute of Physical Science and Information Technology, Anhui University, Hefei 230601, China

<sup>2</sup>Department of Materials Science and Engineering, University of Toronto, Ontario M5S 3E4, Canada

<sup>3</sup>Yangtze Delta Region Institute (Huzhou), University of Electronic Science and Technology of China, Huzhou 313001, China

<sup>4</sup>Department of Mechanical and Industrial Engineering, University of Toronto, Ontario M5S 3G8, Canada

**Table S1.** Atomic occupancy in  $\text{Li}_6\text{PS}_5\text{Cl}$  and  $\text{Li}_{5.5}\text{PS}_{4.5}\text{Cl}_{1.5}$ .

| Atom          | Wyckoff Position | Occupancy ( $\text{Li}_6\text{PS}_5\text{Cl}$ ) | Occupancy ( $\text{Li}_{5.5}\text{PS}_{4.5}\text{Cl}_{1.5}$ ) |
|---------------|------------------|-------------------------------------------------|---------------------------------------------------------------|
| $\text{Li}_1$ | $48h$            | 0.456                                           | 0.440                                                         |
| $\text{P}_1$  | $4b$             | 1.000                                           | 1.000                                                         |
| $\text{Cl}_1$ | $4a$             | 0.615                                           | 0.370                                                         |
| $\text{S}_1$  | $4a$             | 0.385                                           | 0.630                                                         |
| $\text{Cl}_2$ | $4d$             | 0.834                                           | 0.630                                                         |
| $\text{S}_2$  | $4d$             | 0.166                                           | 0.370                                                         |
| $\text{S}_3$  | $16e$            | 0.618                                           | 1.000                                                         |

**Table S2.** Total energy and lattice parameter of Li<sub>6</sub>PS<sub>5</sub>Cl obtained from DFT calculations. The most stable structure is indicated in bold.

| Structure ID. | Total energy (eV) | Lattice constant (Å) |             |             | Degree (°)   |              |              |
|---------------|-------------------|----------------------|-------------|-------------|--------------|--------------|--------------|
|               |                   | a                    | b           | c           | $\alpha$     | $\beta$      | $\gamma$     |
| 1             | -215.62           | 9.91                 | 10.08       | 10.02       | 89.92        | 88.12        | 89.82        |
| 2             | -216.05           | 10.03                | 9.91        | 9.89        | 90.19        | 89.78        | 90.45        |
| 3             | -216.27           | 9.88                 | 9.95        | 9.98        | 89.97        | 91.54        | 90.63        |
| 4             | -216.42           | 9.97                 | 9.92        | 9.98        | 89.89        | 89.18        | 90.48        |
| 5             | -216.25           | 10.06                | 9.89        | 9.99        | 89.04        | 89.58        | 90.36        |
| 6             | -216.18           | 10.04                | 9.97        | 9.94        | 89.25        | 88.69        | 87.14        |
| 7             | <b>-216.87</b>    | <b>9.98</b>          | <b>9.96</b> | <b>9.92</b> | <b>90.77</b> | <b>89.53</b> | <b>90.68</b> |
| 8             | -216.41           | 9.92                 | 9.89        | 9.91        | 88.94        | 88.74        | 89.30        |
| 9             | -216.03           | 9.93                 | 9.94        | 10.09       | 89.05        | 88.64        | 88.02        |
| 10            | -216.21           | 9.97                 | 10.05       | 9.85        | 89.22        | 88.99        | 89.37        |

**Table S3.** Total energy and lattice parameter of  $\text{Li}_{5.5}\text{PS}_{4.5}\text{Cl}_{1.5}$  obtained from DFT calculations. The most stable structure is indicated in bold.

| Structure ID. | Total energy (eV) | Lattice constant (Å) |              |              | Degree (°)   |              |              |
|---------------|-------------------|----------------------|--------------|--------------|--------------|--------------|--------------|
|               |                   | a                    | b            | c            | $\alpha$     | $\beta$      | $\gamma$     |
| 1             | -203.63           | 10.18                | 9.92         | 9.86         | 89.46        | 92.02        | 89.32        |
| 2             | -203.45           | 9.87                 | 10.08        | 10.21        | 91.53        | 89.82        | 90.64        |
| <b>3</b>      | <b>-203.72</b>    | <b>9.82</b>          | <b>10.03</b> | <b>10.03</b> | <b>90.24</b> | <b>88.88</b> | <b>89.74</b> |
| 4             | -203.71           | 10.17                | 9.79         | 9.88         | 89.52        | 91.99        | 88.35        |
| 5             | -203.39           | 9.99                 | 9.74         | 10.08        | 87.64        | 90.86        | 90.07        |
| 6             | -203.34           | 9.79                 | 10.06        | 9.88         | 89.26        | 89.14        | 88.83        |
| 7             | -203.49           | 9.85                 | 10.02        | 9.99         | 89.04        | 90.19        | 89.50        |
| 8             | -202.17           | 9.88                 | 9.91         | 9.93         | 89.55        | 91.92        | 91.97        |
| 9             | -203.15           | 10.17                | 9.81         | 9.86         | 89.15        | 90.05        | 89.07        |
| 10            | -202.34           | 9.91                 | 9.92         | 9.86         | 90.04        | 89.20        | 88.89        |

**Table S4.** Total energy of  $\text{Li}_6\text{PS}_{5-x}\text{Se}_x\text{Cl}$  ( $x = 1 \sim 4$ ) obtained from DFT calculations.

The most stable structure for each Se-doped  $\text{Li}_6\text{PS}_5\text{Cl}$  is indicated in bold.

| Structure ID. | Total energy (eV)                   |                                              |                                              |                                     |
|---------------|-------------------------------------|----------------------------------------------|----------------------------------------------|-------------------------------------|
|               | $\text{Li}_6\text{PS}_4\text{SeCl}$ | $\text{Li}_6\text{PS}_3\text{Se}_2\text{Cl}$ | $\text{Li}_6\text{PS}_2\text{Se}_3\text{Cl}$ | $\text{Li}_6\text{PS}_4\text{SeCl}$ |
| 1             | -212.56                             | -208.15                                      | -204.96                                      | <b>-201.27</b>                      |
| 2             | -212.94                             | -208.99                                      | -204.98                                      | -201.15                             |
| 3             | -212.73                             | -208.66                                      | -204.91                                      | -201.09                             |
| 4             | 212.76                              | -208.53                                      | -204.95                                      | -200.89                             |
| 5             | -212.83                             | -208.96                                      | -205.05                                      | -201.09                             |
| 6             | -212.28                             | -208.59                                      | -204.82                                      | -201.29                             |
| 7             | -212.87                             | -208.90                                      | -204.88                                      | -201.08                             |
| 8             | -212.82                             | -208.84                                      | -204.91                                      | -201.12                             |
| 9             | <b>-213.09</b>                      | <b>-209.05</b>                               | <b>-205.27</b>                               | -201.09                             |
| 10            | -212.80                             | -208.88                                      | -204.92                                      | -201.22                             |

**Table S5.** Total energy of  $\text{Li}_{5.5}\text{PS}_{4.5-x}\text{Se}_x\text{Cl}_{1.5}$  ( $x=1 \sim 3$ ) obtained from DFT calculations.

The most stable structure for each Se-doped  $\text{Li}_{5.5}\text{PS}_{4.5}\text{Cl}_{1.5}$  is indicated in bold.

| Structure ID. | Total energy (eV)                       |                                                  |                                                  |
|---------------|-----------------------------------------|--------------------------------------------------|--------------------------------------------------|
|               | $\text{Li}_6\text{PS}_{3.5}\text{SeCl}$ | $\text{Li}_6\text{PS}_{2.5}\text{Se}_2\text{Cl}$ | $\text{Li}_6\text{PS}_{1.5}\text{Se}_3\text{Cl}$ |
| 1             | -199.77                                 | -195.97                                          | -192.61                                          |
| 2             | -200.18                                 | <b>-196.63</b>                                   | -192.61                                          |
| 3             | <b>-200.26</b>                          | -196.33                                          | -192.55                                          |
| 4             | -200.01                                 | -196.28                                          | -192.36                                          |
| 5             | -199.92                                 | -196.12                                          | -192.11                                          |
| 6             | -200.02                                 | -196.42                                          | -192.51                                          |
| 7             | -199.75                                 | -196.33                                          | -192.17                                          |
| 8             | -199.74                                 | -196.12                                          | -192.36                                          |
| 9             | -199.76                                 | -196.22                                          | <b>-192.66</b>                                   |
| 10            | -199.73                                 | -195.81                                          | -191.88                                          |

**Table S6.** Lattice parameter of the most stable  $\text{Li}_6\text{PS}_{5-x}\text{Se}_x\text{Cl}$  ( $x = 1 \sim 4$ ) structures.

|                     | $\text{Li}_6\text{PS}_4\text{SeCl}$ | $\text{Li}_6\text{PS}_3\text{Se}_2\text{Cl}$ | $\text{Li}_6\text{PS}_2\text{Se}_3\text{Cl}$ | $\text{Li}_6\text{PSSe}_4\text{Cl}$ |
|---------------------|-------------------------------------|----------------------------------------------|----------------------------------------------|-------------------------------------|
| a (Å)               | 10.20                               | 10.32                                        | 10.67                                        | 10.68                               |
| b (Å)               | 10.22                               | 10.66                                        | 10.05                                        | 10.25                               |
| c (Å)               | 10.27                               | 10.11                                        | 10.70                                        | 10.92                               |
| $\alpha$ (°)        | 90.14                               | 90.21                                        | 92.13                                        | 90.30                               |
| $\beta$ (°)         | 88.18                               | 86.90                                        | 90.00                                        | 90.30                               |
| $\gamma$ (°)        | 92.09                               | 90.57                                        | 90.00                                        | 92.64                               |
| V (Å <sup>3</sup> ) | 1069.09                             | 1110.71                                      | 1146.05                                      | 1193.13                             |

**Table S7.** The lattice parameter of the most stable  $\text{Li}_{5.5}\text{PS}_{4.5-x}\text{Se}_x\text{Cl}_{1.5}$  ( $x = 1 \sim 3$ ) structure.

|                     | $\text{Li}_{5.5}\text{PS}_{3.5}\text{SeCl}_{1.5}$ | $\text{Li}_{5.5}\text{PS}_{2.5}\text{Se}_2\text{Cl}_{1.5}$ | $\text{Li}_{5.5}\text{PS}_{1.5}\text{Se}_3\text{Cl}_{1.5}$ |
|---------------------|---------------------------------------------------|------------------------------------------------------------|------------------------------------------------------------|
| a (Å)               | 9.90                                              | 9.97                                                       | 10.11                                                      |
| b (Å)               | 10.14                                             | 10.27                                                      | 10.34                                                      |
| c (Å)               | 10.08                                             | 10.22                                                      | 10.39                                                      |
| $\alpha$ (°)        | 89.95                                             | 90.01                                                      | 89.79                                                      |
| $\beta$ (°)         | 89.66                                             | 89.62                                                      | 89.67                                                      |
| $\gamma$ (°)        | 90.22                                             | 90.24                                                      | 89.41                                                      |
| V (Å <sup>3</sup> ) | 1012.06                                           | 1045.94                                                    | 1085.29                                                    |



**Table S8.** Phase equilibria and reaction energy ( $\Delta E_D$ ) of  $\text{Li}_6\text{PS}_{5-x}\text{Se}_x\text{Cl}$  ( $x = 0 \sim 4$ ) at the interface with  $\text{LiCoO}_2$  and  $\text{Li}_{0.5}\text{CoO}_2$ .

| $C_{\text{SSE}}$                             | $C_{\text{electrode}}$        | $x_m$ | Phase equilibria at $x_m$                                                                                                                         | $\Delta E_D$ (meV/atom) |
|----------------------------------------------|-------------------------------|-------|---------------------------------------------------------------------------------------------------------------------------------------------------|-------------------------|
| $\text{Li}_6\text{PS}_5\text{Cl}$            | $\text{LiCoO}_2$              | 0.53  | $\text{LiCl}$ , $\text{Li}_3\text{PO}_4$ , $\text{Co}_9\text{S}_8$ , $\text{Li}_2\text{SO}_4$ , $\text{Li}_2\text{S}$                             | -302.12                 |
|                                              | $\text{Li}_{0.5}\text{CoO}_2$ | 0.51  | $\text{Li}_2\text{SO}_4$ , $\text{Co}_9\text{S}_8$ , $\text{Li}_3\text{PO}_4$ , $\text{LiCl}$ , $\text{Li}_2\text{S}$                             | -434.98                 |
| $\text{Li}_6\text{PS}_4\text{SeCl}$          | $\text{LiCoO}_2$              | 0.57  | $\text{Li}_2\text{S}$ , $\text{Co}_9\text{S}_8$ , $\text{LiCl}$ , $\text{Li}_2\text{SO}_4$ , $\text{CoSe}_2$ , $\text{Li}_3\text{PO}_4$           | -302.24                 |
|                                              | $\text{Li}_{0.5}\text{CoO}_2$ | 0.51  | $\text{Co}_9\text{S}_8$ , $\text{Li}_3\text{PO}_4$ , $\text{LiCl}$ , $\text{Li}_2\text{SO}_4$ , $\text{Li}_2\text{S}$ , $\text{Li}_2\text{Se}$    | -434.98                 |
| $\text{Li}_6\text{PS}_3\text{Se}_2\text{Cl}$ | $\text{LiCoO}_2$              | 0.61  | $\text{Co}_9\text{S}_8$ , $\text{Li}_2\text{S}$ , $\text{Li}_3\text{PO}_4$ , $\text{CoSe}_2$ , $\text{LiCl}$ , $\text{Li}_2\text{SO}_4$           | -310.77                 |
|                                              | $\text{Li}_{0.5}\text{CoO}_2$ | 0.53  | $\text{Li}_2\text{SO}_4$ , $\text{Li}_3\text{PO}_4$ , $\text{Co}_9\text{S}_8$ , $\text{LiCl}$ , $\text{Co}_3\text{Se}_4$ , $\text{Li}_2\text{Se}$ | -434.87                 |
| $\text{Li}_6\text{PS}_2\text{Se}_3\text{Cl}$ | $\text{LiCoO}_2$              | 0.62  | $\text{Li}_2\text{S}$ , $\text{Co}_9\text{S}_8$ , $\text{Li}_2\text{Se}$ , $\text{Li}_3\text{PO}_4$ , $\text{CoSe}_2$ , $\text{LiCl}$             | -319.45                 |
|                                              | $\text{Li}_{0.5}\text{CoO}_2$ | 0.55  | $\text{LiCl}$ , $\text{Co}_9\text{S}_8$ , $\text{Co}_3\text{Se}_4$ , $\text{Li}_2\text{Se}$ , $\text{Li}_2\text{SO}_4$ , $\text{Li}_3\text{PO}_4$ | -433.68                 |
| $\text{Li}_6\text{PSSe}_4\text{Cl}$          | $\text{LiCoO}_2$              | 0.62  | $\text{CoSe}_2$ , $\text{Li}_2\text{S}$ , $\text{LiCl}$ , $\text{Li}_2\text{Se}$ , $\text{Co}_9\text{S}_8$ , $\text{Li}_3\text{PO}_4$             | -328.28                 |
|                                              | $\text{Li}_{0.5}\text{CoO}_2$ | 0.51  | $\text{Li}_2\text{SO}_4$ , $\text{Li}_3\text{PO}_4$ , $\text{Co}_9\text{S}_8$ , $\text{Co}_9\text{Se}_8$ , $\text{LiCl}$ , $\text{Li}_2\text{Se}$ | -432.70                 |

**Table S9.** Phase equilibria and reaction energy ( $\Delta E_D$ ) of  $\text{Li}_{5.5}\text{PS}_{4.5-x}\text{Se}_x\text{Cl}_{1.5}$  ( $x = 0 \sim 3$ ) at the interface with  $\text{LiCoO}_2$  and  $\text{Li}_{0.5}\text{CoO}_2$ .

| $C_{\text{SSE}}$                                           | $C_{\text{electrode}}$        | $x_m$ | Phase equilibria at $x_m$                                                                                                                | $\Delta E_D$ (meV/atom) |
|------------------------------------------------------------|-------------------------------|-------|------------------------------------------------------------------------------------------------------------------------------------------|-------------------------|
| $\text{Li}_{5.5}\text{PS}_{4.5}\text{Cl}_{1.5}$            | $\text{LiCoO}_2$              | 0.52  | $\text{LiCl}$ , $\text{Li}_2\text{S}$ , $\text{Li}_2\text{SO}_4$ , $\text{Co}_9\text{S}_8$ , $\text{Li}_3\text{PO}_4$                    | -308.41                 |
|                                                            | $\text{Li}_{0.5}\text{CoO}_2$ | 0.50  | $\text{Li}_3\text{PO}_4$ , $\text{Co}_9\text{S}_8$ , $\text{Li}_2\text{S}$ , $\text{LiCl}$ , $\text{Li}_2\text{SO}_4$                    | -443.75                 |
| $\text{Li}_{5.5}\text{PS}_{3.5}\text{SeCl}_{1.5}$          | $\text{LiCoO}_2$              | 0.56  | $\text{CoSe}_2$ , $\text{Co}_9\text{S}_8$ , $\text{Li}_2\text{SO}_4$ , $\text{Li}_2\text{S}$ , $\text{LiCl}$ , $\text{Li}_3\text{PO}_4$  | -312.97                 |
|                                                            | $\text{Li}_{0.5}\text{CoO}_2$ | 0.52  | $\text{CoSe}_2$ , $\text{Li}_3\text{PO}_4$ , $\text{Li}_2\text{Se}$ , $\text{Li}_2\text{SO}_4$ , $\text{Co}_9\text{S}_8$ , $\text{LiCl}$ | -444.35                 |
| $\text{Li}_{5.5}\text{PS}_{2.5}\text{Se}_2\text{Cl}_{1.5}$ | $\text{LiCoO}_2$              | 0.60  | $\text{CoSe}_2$ , $\text{LiCl}$ , $\text{Li}_2\text{SO}_4$ , $\text{Co}_9\text{S}_8$ , $\text{Li}_2\text{S}$ , $\text{Li}_3\text{PO}_4$  | -322.69                 |
|                                                            | $\text{Li}_{0.5}\text{CoO}_2$ | 0.55  | $\text{LiCl}$ , $\text{Li}_3\text{PO}_4$ , $\text{CoSe}_2$ , $\text{Li}_2\text{SO}_4$ , $\text{Li}_2\text{Se}$ , $\text{Co}_9\text{S}_8$ | -443.70                 |
| $\text{Li}_{5.5}\text{PS}_{1.5}\text{Se}_3\text{Cl}_{1.5}$ | $\text{LiCoO}_2$              | 0.61  | $\text{CoSe}_2$ , $\text{Li}_3\text{PO}_4$ , $\text{Li}_2\text{Se}$ , $\text{Li}_2\text{S}$ , $\text{LiCl}$ , $\text{Co}_9\text{S}_8$    | -332.08                 |
|                                                            | $\text{Li}_{0.5}\text{CoO}_2$ | 0.59  | $\text{Co}_9\text{S}_8$ , $\text{LiCl}$ , $\text{CoSe}_2$ , $\text{Li}_2\text{SO}_4$ , $\text{Li}_2\text{Se}$                            | -443.10                 |

**Table S10.** Phase equilibria and reaction energy ( $\Delta E_D$ ) of  $\text{Li}_6\text{PS}_{5-x}\text{Se}_x\text{Cl}$  ( $x = 0 \sim 4$ ) at the interface with  $\text{LiFePO}_4$  and  $\text{FePO}_4$ .

| $C_{\text{SSE}}$                             | $C_{\text{electrode}}$ | $x_m$ | Phase equilibria at $x_m$                                                                          | $\Delta E_D$ (meV/atom) |
|----------------------------------------------|------------------------|-------|----------------------------------------------------------------------------------------------------|-------------------------|
| $\text{Li}_6\text{PS}_5\text{Cl}$            | $\text{LiFePO}_4$      | 0.39  | $\text{Li}_3\text{PO}_4$ , FePS, $\text{Li}_4\text{P}_2\text{O}_7$ , LiCl, $\text{FeS}_2$          | -99.75                  |
|                                              | $\text{FePO}_4$        | 0.45  | LiCl, $\text{FeS}_2$ , $\text{Li}_4\text{P}_2\text{O}_7$ , FePS, $\text{LiPO}_3$                   | -196.86                 |
| $\text{Li}_6\text{PS}_4\text{SeCl}$          | $\text{LiFePO}_4$      | 0.43  | FePS, Se, $\text{FeSe}_2$ , $\text{Li}_3\text{PO}_4$ , $\text{FeS}_2$ , LiCl                       | -101.73                 |
|                                              | $\text{FePO}_4$        | 0.45  | $\text{FeSe}_2$ , LiCl, $\text{LiPO}_3$ , $\text{FeS}_2$ , FePS, $\text{Li}_4\text{P}_2\text{O}_7$ | -196.53                 |
| $\text{Li}_6\text{PS}_3\text{Se}_2\text{Cl}$ | $\text{LiFePO}_4$      | 0.43  | $\text{FeS}_2$ , FePS, $\text{FeSe}_2$ , LiCl, $\text{Li}_3\text{PO}_4$ , Se                       | -107.28                 |
|                                              | $\text{FePO}_4$        | 0.45  | $\text{FeS}_2$ , $\text{FeSe}_2$ , $\text{Li}_4\text{P}_2\text{O}_7$ , FePS, LiCl, $\text{LiPO}_3$ | -202.34                 |
| $\text{Li}_6\text{PS}_2\text{Se}_3\text{Cl}$ | $\text{LiFePO}_4$      | 0.43  | LiCl, $\text{FeS}_2$ , FePS, $\text{FeSe}_2$ , Se, $\text{Li}_3\text{PO}_4$                        | -112.83                 |
|                                              | $\text{FePO}_4$        | 0.50  | $\text{FeS}_2$ , Se, $\text{FeSe}_2$ , LiCl, $\text{Li}_4\text{P}_2\text{O}_7$ , FePS              | -208.47                 |
| $\text{Li}_6\text{PSSe}_4\text{Cl}$          | $\text{LiFePO}_4$      | 0.43  | $\text{FeSe}_2$ , $\text{Li}_3\text{PO}_4$ , Se, LiCl, FePS                                        | -118.59                 |
|                                              | $\text{FePO}_4$        | 0.50  | FePS, $\text{FeS}_2$ , LiCl, $\text{FeSe}_2$ , $\text{Li}_4\text{P}_2\text{O}_7$ , Se              | -215.19                 |

**Table S11.** Phase equilibria and reaction energy ( $\Delta E_D$ ) of  $\text{Li}_{5.5}\text{PS}_{4.5-x}\text{Se}_x\text{Cl}_{1.5}$  ( $x = 0 \sim 3$ ) at the interface with  $\text{LiFePO}_4$  and  $\text{FePO}_4$ .

| $C_{\text{SSE}}$                                           | $C_{\text{electrode}}$ | $x_m$ | Phase equilibria at $x_m$                                                                                                   | $\Delta E_D$ (meV/atom) |
|------------------------------------------------------------|------------------------|-------|-----------------------------------------------------------------------------------------------------------------------------|-------------------------|
| $\text{Li}_{5.5}\text{PS}_{4.5}\text{Cl}_{1.5}$            | $\text{LiFePO}_4$      | 0.40  | $\text{Li}_4\text{P}_2\text{O}_7$ , $\text{Li}_3\text{PO}_4$ , $\text{FeS}_2$ , $\text{LiCl}$ , $\text{FePS}$               | -87.52                  |
|                                                            | $\text{FePO}_4$        | 0.46  | $\text{LiPO}_3$ , $\text{LiCl}$ , $\text{FePS}$ , $\text{FeS}_2$ , $\text{Li}_4\text{P}_2\text{O}_7$                        | -177.68                 |
| $\text{Li}_{5.5}\text{PS}_{3.5}\text{SeCl}_{1.5}$          | $\text{LiFePO}_4$      | 0.45  | $\text{Se}$ , $\text{FePS}$ , $\text{LiCl}$ , $\text{Li}_4\text{P}_2\text{O}_7$ , $\text{FeS}_2$ , $\text{Li}_3\text{PO}_4$ | -91.61                  |
|                                                            | $\text{FePO}_4$        | 0.46  | $\text{FeSe}_2$ , $\text{FeS}_2$ , $\text{LiPO}_3$ , $\text{Li}_4\text{P}_2\text{O}_7$ , $\text{FePS}$ , $\text{LiCl}$      | -180.63                 |
| $\text{Li}_{5.5}\text{PS}_{2.5}\text{Se}_2\text{Cl}_{1.5}$ | $\text{LiFePO}_4$      | 0.47  | $\text{FeS}_2$ , $\text{LiCl}$ , $\text{FePS}$ , $\text{FeSe}_2$ , $\text{Se}$ , $\text{Li}_3\text{PO}_4$                   | -98.99                  |
|                                                            | $\text{FePO}_4$        | 0.46  | $\text{FePS}$ , $\text{Li}_4\text{P}_2\text{O}_7$ , $\text{LiCl}$ , $\text{LiPO}_3$ , $\text{FeSe}_2$ , $\text{FeS}_2$      | -187.01                 |
| $\text{Li}_{5.5}\text{PS}_{1.5}\text{Se}_3\text{Cl}_{1.5}$ | $\text{LiFePO}_4$      | 0.47  | $\text{Li}_3\text{PO}_4$ , $\text{FePS}$ , $\text{FeSe}_2$ , $\text{Se}$ , $\text{LiCl}$ , $\text{FeS}_2$                   | -105.62                 |
|                                                            | $\text{FePO}_4$        | 0.46  | $\text{FeS}_2$ , $\text{FeSe}_2$ , $\text{FePS}$ , $\text{Li}_4\text{P}_2\text{O}_7$ , $\text{LiPO}_3$ , $\text{LiCl}$      | -193.51                 |

**Figure S1.** Crystal structure of (a) - (d)  $\text{Li}_6\text{PS}_{5-x}\text{Se}_x\text{Cl}$  ( $x = 1 \sim 4$ ) and (e) - (g)  $\text{Li}_{5.5}\text{PS}_{4.5-x}\text{Se}_x\text{Cl}_{1.5}$  ( $x = 1 \sim 3$ ). The blue, yellow, orange, watchet and purple spheres represent the Li, S, Cl, P and Se atoms, respectively.

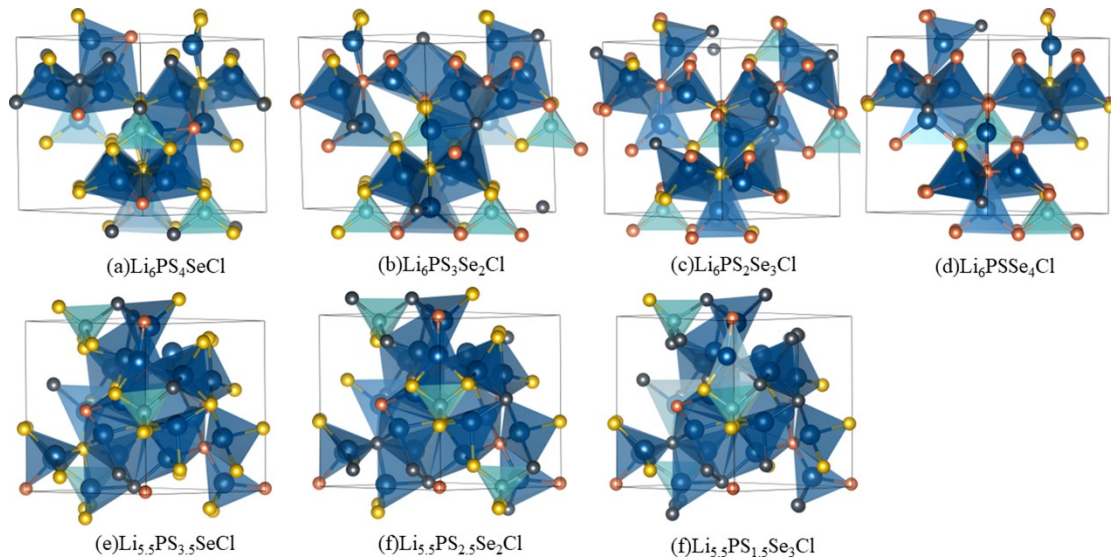

**Figure S2.** The mean square displacement (MSD) of  $\text{Li}^+$  ions in (a)  $\text{Li}_6\text{PS}_5\text{Cl}$ , (b)  $\text{Li}_6\text{PS}_4\text{SeCl}$ , (c)  $\text{Li}_6\text{PS}_3\text{Se}_2\text{Cl}$ , (d)  $\text{Li}_6\text{PS}_2\text{Se}_3\text{Cl}$  and (e)  $\text{Li}_6\text{PSSe}_4\text{Cl}$  during 120 ps simulation time. (f) Diffusivity and activation energy of  $\text{Li}_6\text{PS}_{5-x}\text{Se}_x\text{Cl}$  ( $x = 0 \sim 4$ ) deduced from AIMD simulations at elevated temperatures ranging from 500 to 1000 K.

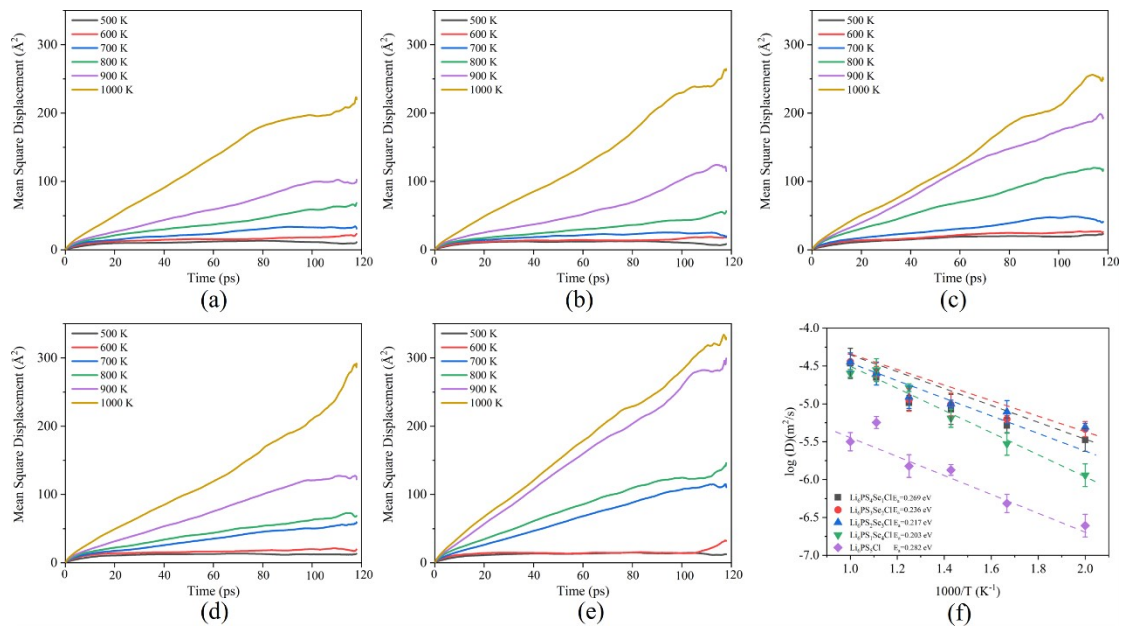

**Figure S3.** The mean square displacement (MSD) of  $\text{Li}^+$  ions in (a)  $\text{Li}_{5.5}\text{PS}_{4.5}\text{Cl}_{1.5}$ , (b)  $\text{Li}_{5.5}\text{PS}_{3.5}\text{SeCl}_{1.5}$ , (c)  $\text{Li}_{5.5}\text{PS}_{2.5}\text{Se}_2\text{Cl}_{1.5}$  and (d)  $\text{Li}_{5.5}\text{PS}_{1.5}\text{Se}_3\text{Cl}_{1.5}$  during 120 ps simulation time. (e) Diffusivity and activation energy of  $\text{Li}_{5.5}\text{PS}_{4.5-x}\text{Se}_x\text{Cl}_{1.5}$  ( $x = 0 \sim 3$ ) deduced from AIMD simulations at elevated temperatures ranging from 500 to 1000 K.

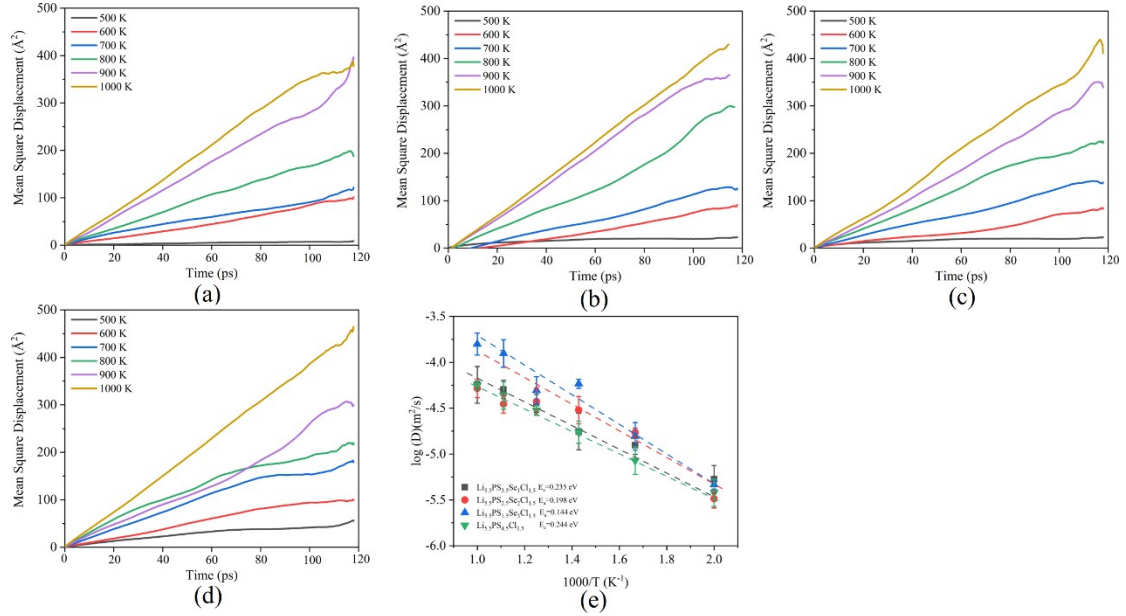

**Figure S4.** The  $\text{Li}^+$  migration pathway of (a)  $\text{Li}_6\text{PS}_5\text{Cl}$  and (b)  $\text{Li}_{5.5}\text{PS}_{4.5}\text{Cl}_{1.5}$  at 500 K. The blue, green, yellow and red spheres represent the Li, P, S and Cl atoms, respectively. The blue line represents the  $\text{Li}^+$  migration pathway during 120 ps simulation time.

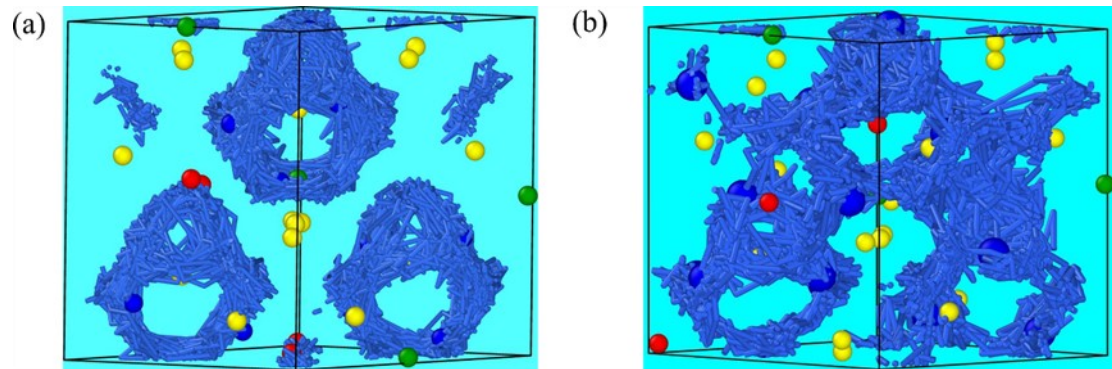

Supplement: d2tc03696g1.pdf [file d2tc03696g1.pdf]
